# Supplementary material
Source: PubMed Central journal article supplement (PMC2775645)
Supplement: jc.2009-0743_1.pdf [file jc.2009-0743_1.pdf]

Supplemental Table 1

| Histology (patients)             | Therapy                                                                                                                                                                                                                                        |
|----------------------------------|------------------------------------------------------------------------------------------------------------------------------------------------------------------------------------------------------------------------------------------------|
| Papillary Thyroid Carcinoma (9)  | vorinostat; celecoxib; depsipeptide; bortezomib; oxaliplatin + irinotecan + gemcitabine + bevacizumab; adriamycin + intensity modulated radiation therapy; carboplatin + paclitaxel; motesanib diphosphate; docetaxel + gemcitabine + ciplatin |
| Medullary Thyroid Carcinoma (12) | motesanib diphosphate (n = 3); vandetanib (n = 2); imatinib + dacarbazine + capecitabine (n = 2); AEE 788; temozolomide + imatinib + capecitabine; sorafenib; dacarbazine; temozolomide                                                        |
| Anaplastic Thyroid Carcinoma (3) | cisplatin + radiation therapy; paclitaxel; cisplatin + cetuximab + radiation therapy                                                                                                                                                           |
