# Supplementary material
Source: PubMed Central journal article supplement (PMC2775645)

# Supplemental Figure 1

(a)

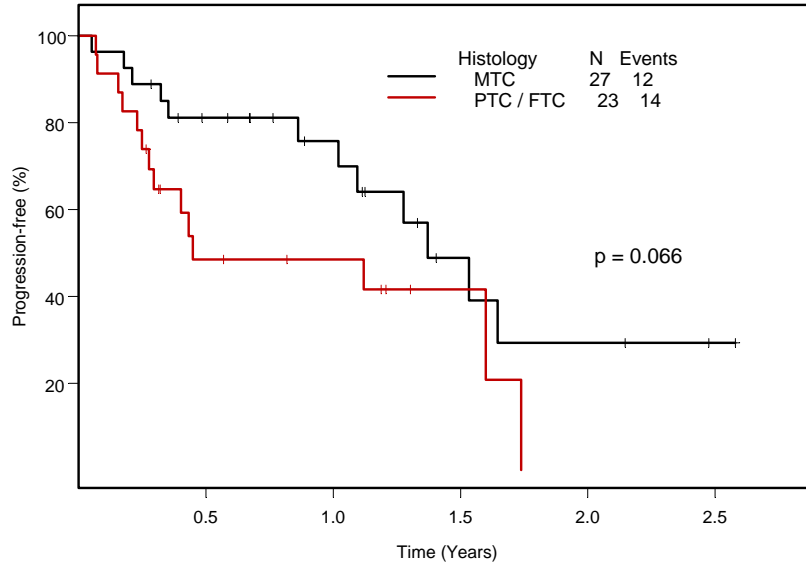

(b)

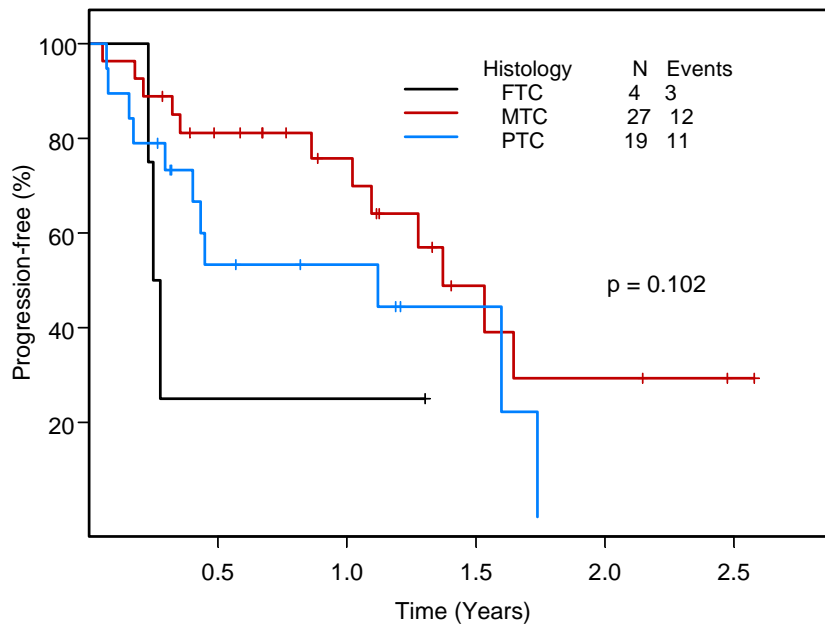

Supplement: jc.2009-0743_2.pdf [file jc.2009-0743_2.pdf]

## Supplemental Figure 2

(a)

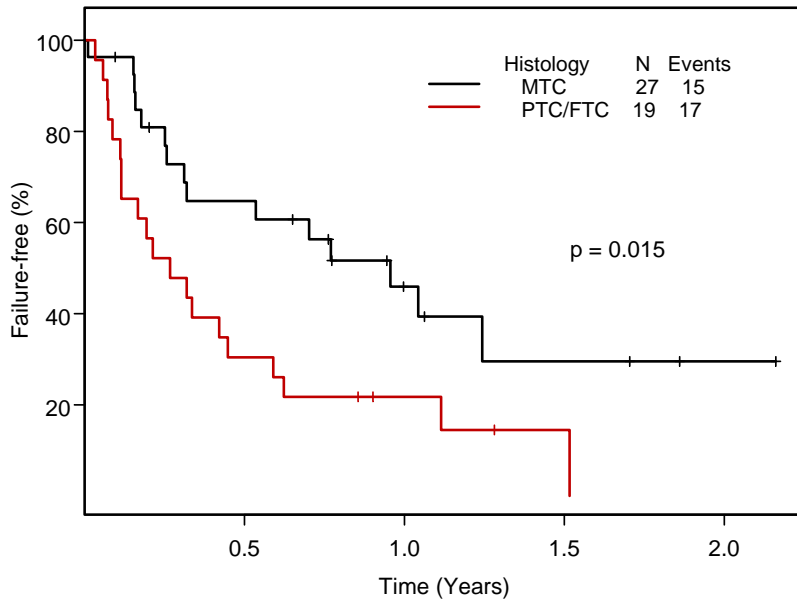

(b)

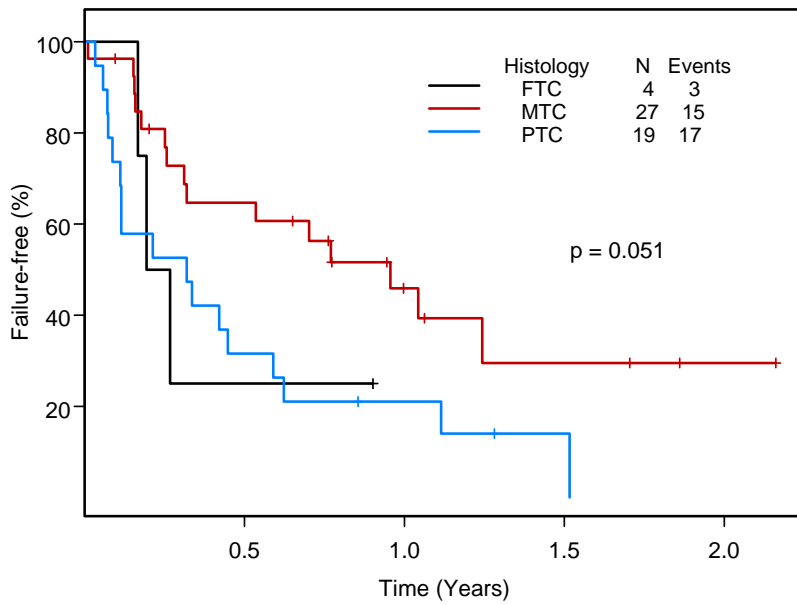

Supplement: jc.2009-0743_3.pdf [file jc.2009-0743_3.pdf]
